# Supplementary material
Source: PubMed Central journal article supplement (PMC7787571)
Supplement: SF_in_female_runners.pdf [file SF_in_female_runners.pdf]

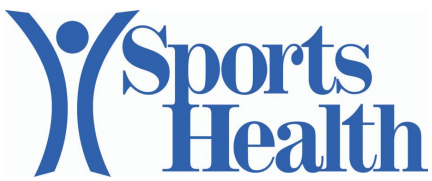

# PHYSIOLOGICAL FACTORS OF FEMALE RUNNERS WITH AND WITHOUT STRESS FRACTURE HISTORIES

## A Pilot Study

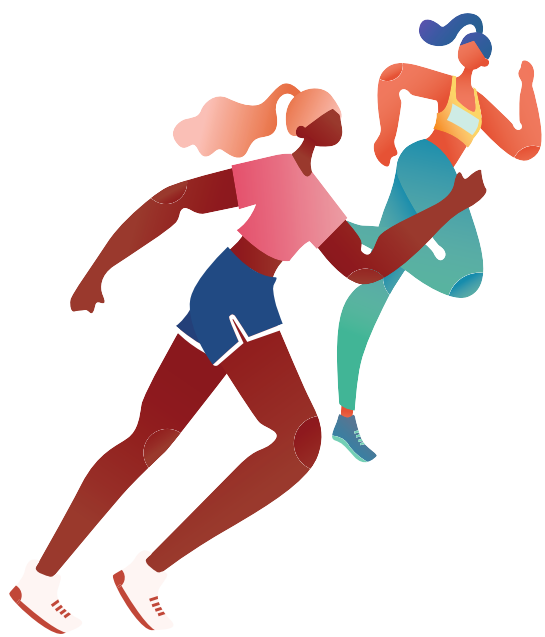

**RUNNING-RELATED STRESS FRACTURES ACCOUNT FOR 69% OF ALL STRESS FRACTURES AND WOMEN HAVE AT LEAST 2X GREATER RISK OF STRESS FRACTURE INJURY THAN MEN.**

**This study compared physiological and running-related factors between women with and without a history of running-related stress fracture:**

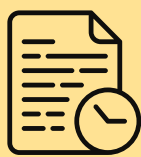

**MEDICAL, MENSTRUAL CYCLE, RUNNING, INJURY, AND NUTRITIONAL HISTORIES**

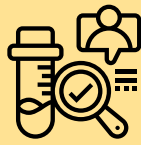

**BLOOD HISTOLOGY RELATED TO NUTRITIONAL, HORMONAL, & BONE-RELATED RISK FACTORS**

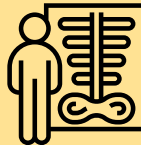

**BONE DENSITY, FAT, AND LEAN TISSUE**

**FEMALE RUNNERS WITH LOW HIP BONE MINERAL DENSITY, MENSTRUAL CHANGES DURING PEAK TRAINING, AND ELEVATED BONE TURNOVER MARKERS MAY BE AT AN INCREASED RISK OF STRESS FRACTURE.**

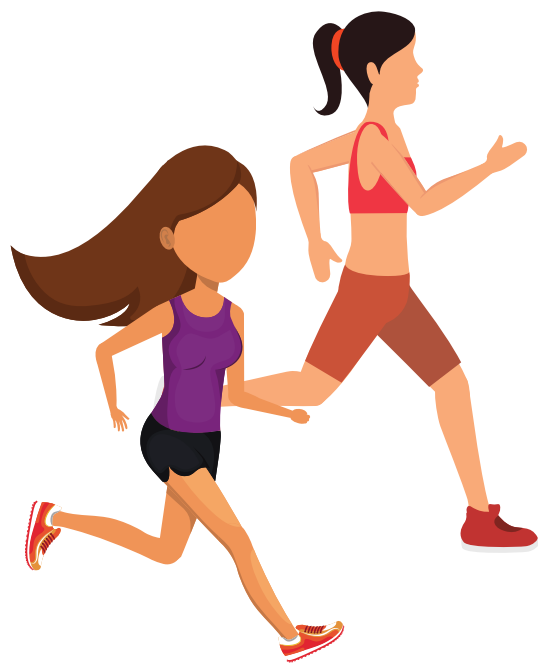

**Our Partners**

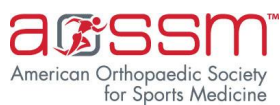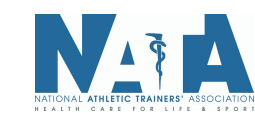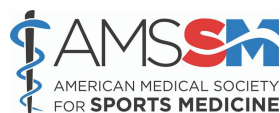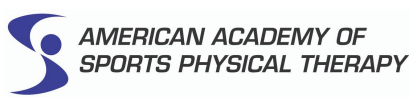

**Connect with Us!**

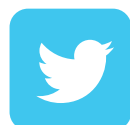

[@SPORTS\\_HEALTH](https://twitter.com/SPORTS_HEALTH)

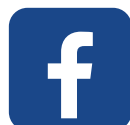

[@SPORTSHEALTHJOURNAL](https://www.facebook.com/SPORTSHEALTHJOURNAL)
